# Supplementary material for: The Gene Set Builder: collation, curation, and distribution of sets of genes
Source: Springer Nature journal article supplement (doi:10.1186/1471-2105-6-305), 2005-12-21

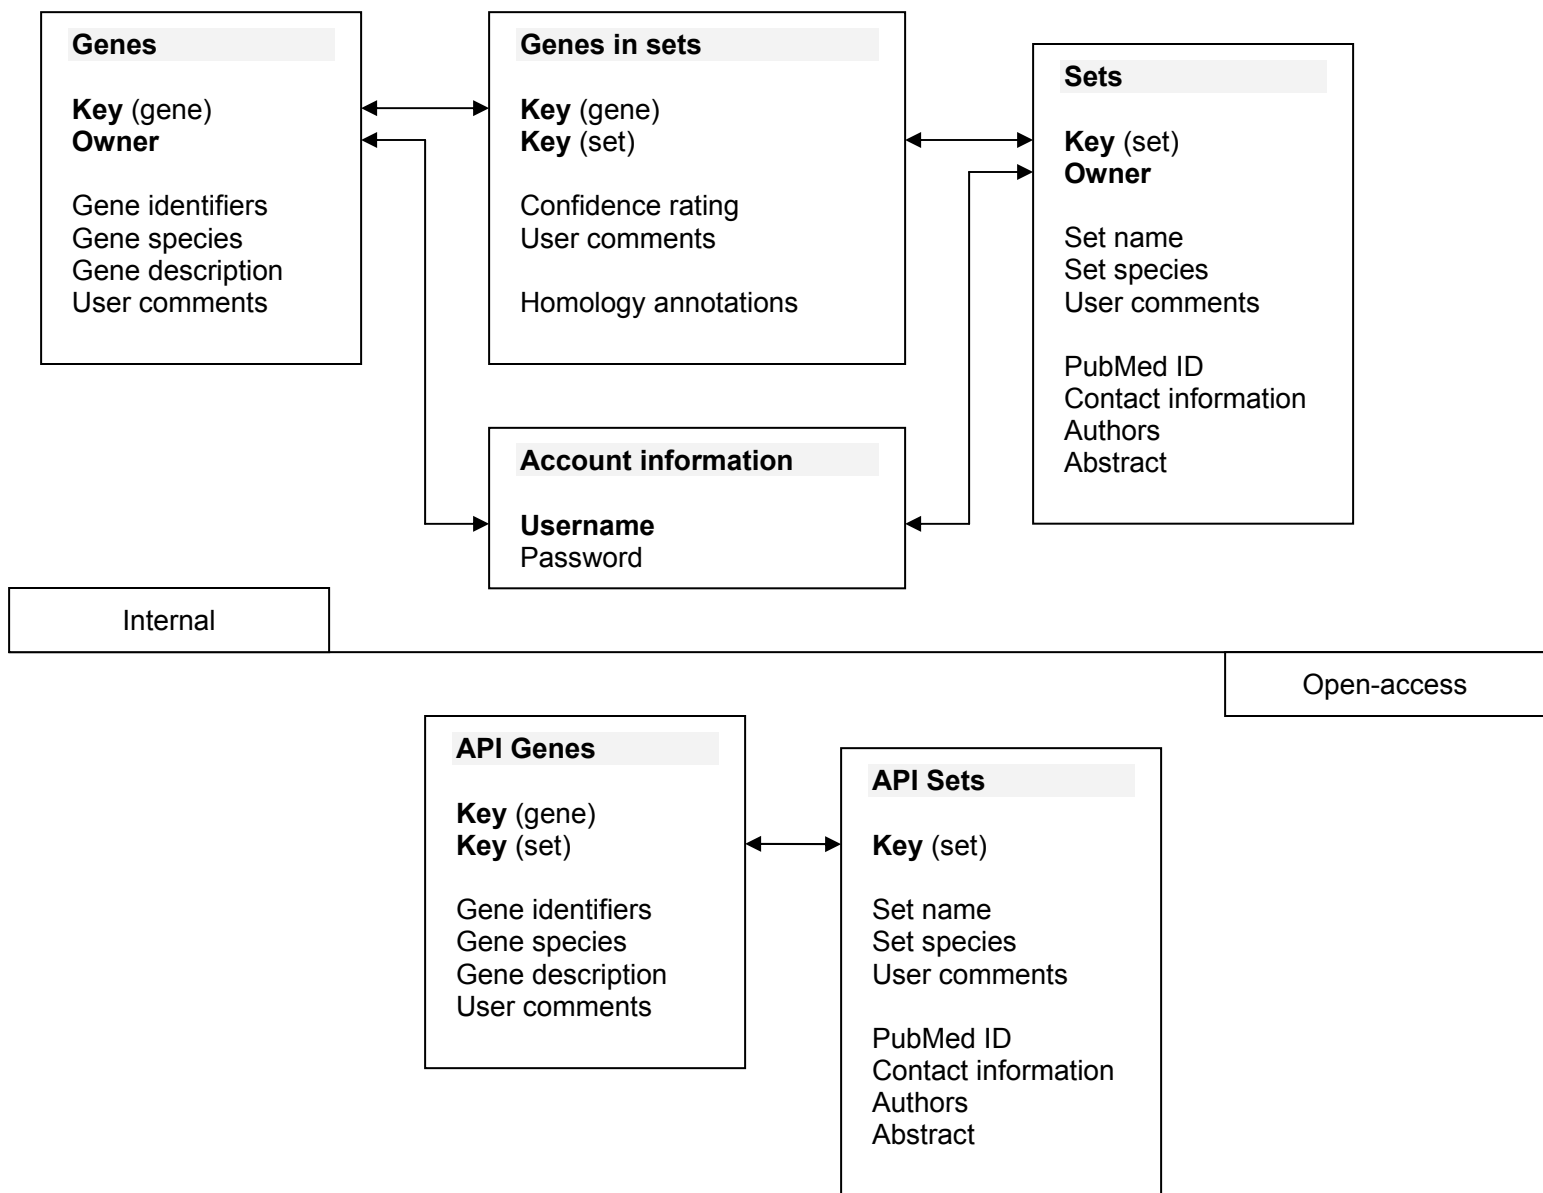

Supplement: 12859_2005_629_MOESM1_ESM.pdf [file 12859_2005_629_MOESM1_ESM.pdf]
